# Supplementary material for: Molecular epidemiology of Colombian Histoplasma capsulatum isolates obtained from human and chicken manure samples
Source: PubMed Central journal article supplement — Heliyon. 2019 Jul 23;5(7):e02084. doi: 10.1016/j.heliyon.2019.e02084 (PMC6660563; doi:10.1016/j.heliyon.2019.e02084), 2019-07-23
Supplement: mmc1.pdf [file mmc1.pdf]

**RESOLUCIÓN No. 00005865  
(19/05/2017)**

Por la cual se actualiza el representante legal en el registro otorgado a la Universidad de Antioquia - Grupo Interdisciplinario de Estudios Moleculares GIEM de, como Laboratorio de control de Calidad de Fertilizantes de Uso Agrícola, bajo la Resolución No. 1888 del 10 de julio de 1992 y se otorga el número único de registro.

---

**LA SUBGERENTE DE ANALISIS Y DIAGNOSTICO DEL INSTITUTO COLOMBIANO  
AGROPECUARIO, ICA,**

**En uso de sus facultades legales y en especial de las que le confieren los Decretos 2141 de 1992, 1071 de 2015, 4765 de 2008, el Acuerdo 002 de 2009, Resolución 1676 de 2011, Resolución 003823 de 2013 y la Resolución Modificatoria 009001 de 2016 y**

**CONSIDERANDO:**

Que el Instituto Colombiano Agropecuario, ICA, mediante Resolución No. 1888 del 10 de julio de 1992, ordenó el registro del Departamento de Química de la Universidad de Antioquia, ubicado en la calle 67 No. 53-108, en la ciudad de Medellín, como Laboratorio de control de Calidad de Fertilizantes de Uso Agrícola.

Que el Instituto Colombiano Agropecuario, ICA, mediante Resolución No. 02562 del 17 de septiembre de 2001, adiciono el registro del Laboratorio de Química de la facultad de ciencias exactas y naturales de la Universidad de Antioquia, Grupo GIEM.

Que el Instituto Colombiano Agropecuario, ICA, mediante Resolución No. 01876 del 14 de julio de 2003, ordeno el registro al Grupo Interdisciplinario de Estudios Moleculares GIEM de la Universidad de Antioquia, como Laboratorio de control de Calidad de Fertilizantes de Uso Agrícola.

Que el Instituto Colombiano Agropecuario, ICA, mediante Resolución No. 000235 del 31 de enero de 2005, amplio el registro del Grupo Interdisciplinario de Estudios Moleculares GIEM de la Universidad de Antioquia.

Que el Instituto Colombiano Agropecuario, ICA, mediante Resolución No. 000602 del 27 de febrero de 2008, amplio el registro del Grupo Interdisciplinario de Estudios Moleculares GIEM de la Universidad de Antioquia.

Que el Instituto Colombiano Agropecuario, ICA, mediante Resolución No. 0000699 del 04

**RESOLUCIÓN No. 00005865  
(19/05/2017)**

Por la cual se actualiza el representante legal en el registro otorgado a la Universidad de Antioquia - Grupo Interdisciplinario de Estudios Moleculares GIEM de, como Laboratorio de control de Calidad de Fertilizantes de Uso Agrícola, bajo la Resolución No. 1888 del 10 de julio de 1992 y se otorga el número único de registro.

---

de febrero de 2011, modificó el registro del Grupo Interdisciplinario de Estudios Moleculares GIEM de la Universidad de Antioquia.

Que el señor Mauricio Alviar Ramírez, en calidad de Rector y Representante Legal de la Universidad de Antioquia, mediante comunicación radicada el 04/04/2017 No. 20171106795, solicitó al ICA la actualización del representante legal de la Universidad al señor Mauricio Alviar Ramírez y presentó los documentos exigidos por la Resolución 009001 de 2016 Modificatoria de la Resolución 003823 de 2013.

Que una vez recibida la documentación presentada por el Laboratorio, se evidenció el cumplimiento de lo establecido en el Artículo 10 de la Resolución 03823 del 2013 modificado por el Artículo 1 de la Resolución 009001 del 2016.

Que en la Resolución No. 009001 de fecha 21 de julio de 2016, modificatoria de la Resolución No. 003823 del 04 de septiembre de 2013, en su Artículo Primero Parágrafo 1, establece que se emitirá el acto administrativo modificatorio del registro, el cual tendrá una vigencia máxima hasta el cuatro (4) de febrero de 2018.

Que la solicitud respectiva ha sido presentada y tramitada con observancia de las formalidades legales y reglamentarias;

Que en virtud de lo anterior, esta Subgerencia:

**RESUELVE:**

**ARTÍCULO PRIMERO:** Actualizar el representante legal en el registro otorgado al Laboratorio Grupo Interdisciplinario de Estudios Moleculares GIEM de la Universidad de Antioquia, como Laboratorio de control de Calidad de Fertilizantes de Uso Agrícola, bajo la Resolución No. 1888 del 10 de julio de 1992, el cual es, el señor Mauricio Alviar Ramírez, identificado con cc No. 71.649.045 de Medellín.

**PARAGRAFO:** Los análisis para los cuales el ICA otorgó el registro son:

**RESOLUCIÓN No. 00005865  
(19/05/2017)**

Por la cual se actualiza el representante legal en el registro otorgado a la Universidad de Antioquia - Grupo Interdisciplinario de Estudios Moleculares GIEM de, como Laboratorio de control de Calidad de Fertilizantes de Uso Agrícola, bajo la Resolución No. 1888 del 10 de julio de 1992 y se otorga el número único de registro.

---

En abonos o acondicionadores orgánicos y materias primas

1. Ácidos Fúlvicos (extracción-volumetría)
2. Ácidos Húmicos (extracción-volumetría)
3. Capacidad de Intercambio Catiónico (Acetato de amonio)
4. Capacidad de Retención de Humedad (gravimetría)
5. Carbono Orgánico (volumétrico)
6. Cenizas (gravimétrico)
7. Conductividad Eléctrica (conductímetro)
8. Densidad aparente para sólidos (gravimétrico)
9. Extracto Húmico Total (extracción-volumetría)
10. Índice de compostaje (espectrofotometría)
11. Metales pesados: Cadmio, Cromo, Níquel, Plomo y Mercurio (electroforesis capilar)
12. Pérdidas por volatilización (gravimétrico)
13. pH (potenciométrico)
14. Tamaño de partícula (granulometría)

Para fertilizantes y acondicionadores Inorgánicos y Orgánicos

1. Aluminio (electroforesis capilar).
2. Amonio Soluble en Agua (electroforesis capilar).
3. Azufre Total (gravimétrico)
4. Calcio (electroforesis capilar)
5. Cobre (absorción atómica)
6. Densidad en líquidos (picnómetro)
7. Fósforo Total (espectrofotométrico)
8. Hierro (absorción atómica)
9. Humedad (pérdida de peso)
10. Magnesio (electroforesis capilar)
11. Manganeso absorción atómica)

**RESOLUCIÓN No. 00005865**  
**(19/05/2017)**

Por la cual se actualiza el representante legal en el registro otorgado a la Universidad de Antioquia - Grupo Interdisciplinario de Estudios Moleculares GIEM de, como Laboratorio de control de Calidad de Fertilizantes de Uso Agrícola, bajo la Resolución No. 1888 del 10 de julio de 1992 y se otorga el número único de registro.

- 
12. Nitrógeno Total (Kjeldahl)
  13. Nitrógeno Ureico (Kjeldahl)
  14. Potasio Soluble en Agua (absorción atómica, electroforesis capilar)
  15. Potasio Total (absorción atómica, electroforesis capilar)
  16. Sodio (electroforesis capilar)
  17. Zinc (electroforesis capilar)

En abonos o fertilizantes y Acondicionadores Orgánicos

1. Detección de Salmonella sp. Límite de detección 10 u.f.c/ml. Método interno G-8840-06-S035
2. Determinación de los aminoácidos: Alanina, Argiina, Asparagina, Acido Aspartico, Cisteina, Cistina, Glutamina, Acido Glutamico, Glicina, Histidina, Isoleucina, Leucina, Lisina, Metionina, Fenilalanina, Prolina, Serina, Treonina, Tirosina, Triptofano y Valina (Electroforesis Capilar)
3. Recuento de enterobacterias, bacterias aerobias mesófilas, mohos y levaduras. Metodo: recuento estándar en placa

**ARTICULO SEGUNDO:** Otórguese al Grupo Interdisciplinario de Estudios Moleculares GIEM de la Universidad de Antioquia, ubicado en la calle 67 No. 53-108, en la ciudad de Medellín, el número de registro único No. **050010124**, como Laboratorio de control de Calidad de Fertilizantes de Uso Agrícola

**ARTÍCULO TERCERO:** El presente Registro como Laboratorio de control de Calidad Fertilizantes de Uso Agrícola, tiene vigencia hasta el 4 de febrero del 2018 de acuerdo con lo establecido en el artículo primero en la resolución No. 009001 del 21 de julio del 2016 o aquella que la adicione, modifique o sustituya.

**ARTICULO CUARTO:** Notificar el presente acto administrativo de acuerdo con lo

**RESOLUCIÓN No. 00005865  
(19/05/2017)**

Por la cual se actualiza el representante legal en el registro otorgado a la Universidad de Antioquia - Grupo Interdisciplinario de Estudios Moleculares GIEM de, como Laboratorio de control de Calidad de Fertilizantes de Uso Agrícola, bajo la Resolución No. 1888 del 10 de julio de 1992 y se otorga el número único de registro.

---

consagrado en los artículos 67 a 69 del código de Procedimiento Administrativo y de lo Contencioso Administrativo (Ley 1437 de 2011), entregando al interesado copia íntegra, auténtica y gratuita.

**ARTICULO QUINTO:** Contra la presente resolución proceden los recursos de reposición y subsidiario de apelación, los cuales de acuerdo con lo contenido en el artículo 76 del Código de Procedimiento Administrativo y de lo Contencioso Administrativo (Ley 1439, deberán interponerse dentro de los diez (10) días hábiles siguientes a su notificación.

**ARTÍCULO SEXTO:** La presente resolución rige a partir de la fecha de su notificación y actualiza la Resolución No. 1888 del 10 de julio de 1992.

**ARTICULO SEPTIMO:** Las demás disposiciones que no han sido modificadas con la presente resolución conservarán plena vigencia.

**NOTIFIQUESE Y CÚMPLASE**

Dada en Bogotá a los 19/05/2017

  
ROSANA MATILDE BROCHADO MATUTE  
Subgerente de Análisis y Diagnostico

Proyectó: Rene Alejandro Castro Jimenez - Grupo de Gestión de Calidad Analítica (BPL)  
VoBo: Hugo Andrés Rodríguez Fajardo - Grupo de Gestión de Calidad Analítica (BPL)  
Revisión Misionales - Oficina Asesora Jurídica  
Teresa Moya Suta - Oficina Asesora Jurídica
