# Supplementary material for: Molecular epidemiology of Colombian Histoplasma capsulatum isolates obtained from human and chicken manure samples
Source: PubMed Central journal article supplement — Heliyon. 2019 Jul 23;5(7):e02084. doi: 10.1016/j.heliyon.2019.e02084 (PMC6660563; doi:10.1016/j.heliyon.2019.e02084), 2019-07-23
Supplement: mmc2.pdf [file mmc2.pdf]

**S2 Table. List of the *Histoplasma capsulatum* Colombian isolates used in this work.**

| <b>Isolate</b> | <b>Source</b> | <b>Phylogenetic specie</b> | <b>Institution</b> | <b>Reference</b> |
|----------------|---------------|----------------------------|--------------------|------------------|
| COL_S_1        | Soil          | LAmA1                      | UdeA               | This work        |
| COL_S_2        | Soil          | LAmA1                      | UdeA               | This work        |
| COL_S_3        | Soil          | LAmA1                      | UdeA               | This work        |
| COL_H_001      | Human         | NAm2                       | UdeA               | This work        |
| COL_H_004      | Human         | LAmA1                      | UdeA               | This work        |
| COL_H_005      | Human         | NAm2                       | UdeA               | This work        |
| COL_H_006      | Human         | LAmB/LAmB1                 | UdeA               | This work        |
| COL_H_007      | Human         | LAmB/LAmB1                 | UdeA               | This work        |
| COL_H_008      | Human         | LAmB/LAmB1                 | UdeA               | This work        |
| COL_H_012      | Human         | LAmB/LAmB1                 | UdeA               | This work        |
| COL_H_013      | Human         | LAmA2                      | CIB                | This work        |
| COL_H_014      | Human         | LAmA2                      | CIB                | This work        |
| COL_H_015      | Human         | LAmA1                      | CIB                | This work        |
| COL_H_016      | Human         | LAmB/LAmB1                 | CIB                | This work        |
| COL_H_017      | Human         | LAmB/LAmB1                 | CIB                | This work        |
| COL_H_018      | Human         | LAmB/LAmB1                 | CIB                | This work        |
| COL_H_019      | Human         | LAmA1                      | CIB                | This work        |
| COL_H_020      | Human         | ?                          | CIB                | This work        |
| COL_H_021      | Human         | LAmA1                      | CIB                | This work        |
| COL_H_024      | Human         | LAmA1                      | CIB                | This work        |
| COL_H_025      | Human         | LAmA2                      | CIB                | This work        |
| COL_H_029      | Human         | LAmB/LAmB1                 | CIB                | This work        |
| COL_H_032      | Human         | LAmB/LAmB1                 | CIB                | This work        |
| COL_H_033      | Human         | ?                          | CIB                | This work        |
| COL_H_034      | Human         | ?                          | CIB                | This work        |
| COL_H_035      | Human         | LAmB/LAmB1                 | CIB                | This work        |
| COL_H_036      | Human         | LAmB/LAmB1                 | CIB                | This work        |
| COL_H_037      | Human         | LAmB/LAmB1                 | CIB                | This work        |

|           |       |            |      |                     |
|-----------|-------|------------|------|---------------------|
| COL_H_038 | Human | NAm2       | CIB  | This work           |
| COL_H_039 | Human | LAmA1      | CIB  | This work           |
| COL_H_040 | Human | LAmB/LAmB1 | UdeA | This work           |
| COL_H_041 | Human | LAmA2      | CIB  | This work           |
| COL_H_042 | Human | LAmB/LAmB1 | CIB  | This work           |
| COL_H_043 | Human | LAmB/LAmB1 | CIB  | This work           |
| COL_H_044 | Human | LAmA1      | CIB  | This work           |
| COL_H_047 | Human | LAmB/LAmB1 | CIB  | This work           |
| COL_H_048 | Human | LAmA1      | CIB  | This work           |
| COL_H_053 | Human | LAmA2      | CIB  | This work           |
| COL_H_055 | Human | LAmA2      | CIB  | This work           |
| COL_H_056 | Human | LAmB/LAmB1 | CIB  | This work           |
| COL_H_057 | Human | LAmB/LAmB1 | CIB  | This work           |
| COL_H_062 | Human | LAmA2      | CIB  | This work           |
| COL_H_064 | Human | LAmB/LAmB1 | CIB  | This work           |
| COL_H_066 | Human | LAmB/LAmB1 | CIB  | This work           |
| COL_H_068 | Human | LAmA2      | CIB  | This work           |
| H59       | Human | LAmB/LAmB1 | CIB  | Kasuga et al., 2003 |
| H60       | Human | LAmA1      | CIB  | Kasuga et al., 2003 |
| H61       | Human | LAmA1      | CIB  | Kasuga et al., 2003 |
| H62       | Human | LAmA1      | CIB  | Kasuga et al., 2003 |
| H63       | Human | LAmA1      | CIB  | Kasuga et al., 2003 |
| H64       | Human | LAmA2      | CIB  | Kasuga et al., 2003 |
| H66       | Human | LAmB/LAmB2 | CIB  | Kasuga et al., 2003 |
| H67       | Human | LAmA2      | CIB  | Kasuga et al., 2003 |
| H68       | Human | LAmB/LAmB1 | CIB  | Kasuga et al., 2003 |
| H69       | Human | LAmB/LAmB2 | CIB  | Kasuga et al., 2003 |
| H71       | Human | LAmA2      | CIB  | Kasuga et al., 2003 |
| H73       | Human | LAmA2      | CIB  | Kasuga et al., 2003 |
| H74       | Human | LAmA2      | CIB  | Kasuga et al., 2003 |
| H76       | Human | LAmA2      | CIB  | Kasuga et al., 2003 |
