# Supplementary material for: Molecular epidemiology of Colombian Histoplasma capsulatum isolates obtained from human and chicken manure samples
Source: PubMed Central journal article supplement — Heliyon. 2019 Jul 23;5(7):e02084. doi: 10.1016/j.heliyon.2019.e02084 (PMC6660563; doi:10.1016/j.heliyon.2019.e02084), 2019-07-23
Supplement: mmc3.pdf [file mmc3.pdf]

1 **S3 Table. Characteristics of the sequences and the structure of each primer and PCR reaction conditions.**

| MLST           | Target                                     | Primer  | Primer Sequence       | Product size | Characteristics                                                                                                                                    | PCR concentrations                                                                                                                                                          | PCR cycling conditions | Reference                      |                                |
|----------------|--------------------------------------------|---------|-----------------------|--------------|----------------------------------------------------------------------------------------------------------------------------------------------------|-----------------------------------------------------------------------------------------------------------------------------------------------------------------------------|------------------------|--------------------------------|--------------------------------|
| Classical MLST | <i>arf</i> (ADP-ribosylation factor)       | arf1    | AGAATATGGGGCAAAAAGGA  | 470          | The sequence is composed by the exon 2 covering the region from 1 to 98 bp and exon 3 from 290 to 478 bp, these are separated by an intron region. | Buffer / 1X<br>MgCl <sub>2</sub> / 1,5 mM<br>DNTPs / 0,2 mM<br>Forward Primer / 0,2 mM<br>Reverse Primer / 0,2 mM<br>DNA Taq / 1 U<br>DNA / 2 µl<br>Reaction volume / 50 µl | 94°C / 3 min           | Kasuga, Taylor, and White 1999 |                                |
|                |                                            | arf2    | CGCAATTCATCTTCGTTGAG  |              |                                                                                                                                                    |                                                                                                                                                                             |                        |                                |                                |
|                | <i>H-anti</i> (H antigen precursor gene)   | H-anti3 | CGCAGTCACCTCCATACTATC | 412          | The sequence is composed by 3 CDS covering the regions from 1 to 112 bp, 233 to 330 bp and 387 to 413 bp, separated by two intron regions.         |                                                                                                                                                                             | 94°C / 15 seg          | 54,8°C / 30 seg                | Kasuga, Taylor, and White 2000 |
|                |                                            | H-anti4 | GCGCCGACATTAACCC      |              |                                                                                                                                                    |                                                                                                                                                                             |                        |                                |                                |
|                | <i>ole</i> (Delta-9 fatty acid desaturase) | ole3    | TTTAAACGAAGCCCCACGG   | 425          | The sequence is composed by 2 CDS covering the regions from 1 to 273 bp and 368 to 428 bp and the intron region from 254 to 367 bp.                |                                                                                                                                                                             | 72°C / 1 min           | 72°C / 5 min                   | Kasuga, Taylor, and White 2001 |
|                |                                            | ole4    | CACCACCTCCAACAGCAGCA  |              |                                                                                                                                                    |                                                                                                                                                                             |                        |                                |                                |
|                | <i>tub1</i>                                | tub1    | GGTGGCCAAATCGCAAACCTC | 278          | The sequence is                                                                                                                                    |                                                                                                                                                                             |                        |                                | Kasuga,                        |

|                       |                                                 |      |                          |     |                                                                                                                                                                                                                                                  |                                                                                                        |                                                            |                                |
|-----------------------|-------------------------------------------------|------|--------------------------|-----|--------------------------------------------------------------------------------------------------------------------------------------------------------------------------------------------------------------------------------------------------|--------------------------------------------------------------------------------------------------------|------------------------------------------------------------|--------------------------------|
|                       | (Alpha-tubulin)                                 | tub2 | GGCAGCTTTCGGTTCCTCAGT    |     | composed by 2 CDS which cover the regions from 1 to 10 bp and 119 to 145 bp and 2 intron regions from 11 to 118 bp and 146 to 263 bp.                                                                                                            |                                                                                                        |                                                            | Taylor, and White 2002         |
|                       | ITS (Internal transcribed spacers 1 rRNA genes) | ITS4 | TCCTCCGCTTATTGATATGC     | 656 | This region contains the partial sequence of 18S ribosomal RNA gene; the complete sequence of the internal transcribed spacer 1, 5.8S ribosomal RNA gene, and internal transcribed spacer 2; and the partial sequence of 28S ribosomal RNA gene. |                                                                                                        |                                                            | Kasuga, Taylor, and White 2003 |
|                       |                                                 | ITS5 | GGAAGTAAAAGTCGTAACAAGG   |     |                                                                                                                                                                                                                                                  |                                                                                                        |                                                            |                                |
| <b>Diagnostic PCR</b> | <i>Hcp100</i> (Protein 100 KDa Human - like)    | HcI  | GCGTTCCGAGCCTTCCACCTCAAC | 319 | The sequence is a partial CDS region. In the sequences, the CDS cover all region.                                                                                                                                                                | Buffer / 1X<br>MgCl <sub>2</sub> / 2 mM<br>DNTPs / 0,2 mM<br>Forward Primer / 0,2 mM<br>Reverse Primer | 94°C / 5 min<br>94°C / 30 seg<br>66°C / 30 seg<br>72°C / 1 | Bialek et al. 2002             |
|                       |                                                 | HcII | ATGTCCCATCGGGCGCCGTGTAGT |     |                                                                                                                                                                                                                                                  |                                                                                                        |                                                            |                                |

|                                   |                 |                          |     |                                                                                                                                                   |                                                                                                                                                                             |                                                                                            |                                    |  |
|-----------------------------------|-----------------|--------------------------|-----|---------------------------------------------------------------------------------------------------------------------------------------------------|-----------------------------------------------------------------------------------------------------------------------------------------------------------------------------|--------------------------------------------------------------------------------------------|------------------------------------|--|
|                                   |                 |                          |     |                                                                                                                                                   |                                                                                                                                                                             | / 0,2 mM<br>DNA Taq / 1 U<br>DNA / 2 µl<br>Reaction<br>volume / 50 µl                      | min<br>72°C / 5<br>min<br>12°C / ∞ |  |
| SCAR 220                          | 1281-1283-220-F | CATTGTTGGAGGAACCTGCT     | 220 | Both sequences were selected as characteristic inside <i>H. capsulatum</i> genome. But SCAR 230 is a partial CDS region from the alpha-amylase A. | Buffer / 1X<br>MgCl <sub>2</sub> / 2,5 mM<br>DNTPs / 0,2 mM<br>Forward Primer / 0,2 mM<br>Reverse Primer / 0,2 mM<br>DNA Taq / 1 U<br>DNA / 2 µl<br>Reaction volume / 50 µl | 94°C / 5 min<br>94°C / 30 seg<br>52°C / 30 seg<br>72°C / 1 min<br>72°C / 5 min<br>12°C / ∞ | Frías De León et al. 2012          |  |
|                                   | 1281-1283-220-R | GAGCTGCAGGATGTTTGTTG     |     |                                                                                                                                                   |                                                                                                                                                                             |                                                                                            |                                    |  |
| SCAR 230                          | 1281-1283-230-F | GGAGCCATGACGTAAATGG      | 230 | Both sequences were selected as characteristic inside <i>H. capsulatum</i> genome. But SCAR 230 is a partial CDS region from the alpha-amylase A. | Buffer / 1X<br>MgCl <sub>2</sub> / 1,5 mM<br>DNTPs / 0,2 mM<br>Forward Primer / 0,2 mM<br>Reverse Primer / 0,2 mM<br>DNA Taq / 1 U<br>DNA / 2 µl<br>Reaction volume / 50 µl | 95°C / 5 min<br>94°C / 1 min<br>60°C / 1 min<br>72°C / 1 min<br>72°C / 5 min<br>12°C / ∞   | Frías De León et al. 2013          |  |
|                                   | 1281-1283-230-R | TATTGCCAATGGGTTTGTC      |     |                                                                                                                                                   |                                                                                                                                                                             |                                                                                            |                                    |  |
| <i>M</i> antigen (M antigen gene) | Msp1F           | ACAAGAGACGACGGTAGCTTCACG | 318 | The sequence is a partial CDS from the region codifying the <i>H. capsulatum</i> Catalase B. In the sequences, the CDS cover all region.          | Buffer / 1X<br>MgCl <sub>2</sub> / 1,5 mM<br>DNTPs / 0,2 mM<br>Forward Primer / 0,2 mM<br>Reverse Primer / 0,2 mM<br>DNA Taq / 1 U                                          | 95°C / 5 min<br>94°C / 1 min<br>60°C / 1 min<br>72°C / 1 min<br>72°C / 5 min<br>12°C / ∞   | Ohno et al. 2013                   |  |
|                                   | Msp2R           | ACCAGCGGCCATAAGGACGTC    |     |                                                                                                                                                   |                                                                                                                                                                             |                                                                                            |                                    |  |

|  |  |  |  |  |  |                                                    |                 |  |
|--|--|--|--|--|--|----------------------------------------------------|-----------------|--|
|  |  |  |  |  |  | DNA / 2 $\mu$ l<br>Reaction<br>volume / 50 $\mu$ l | 12°C / $\infty$ |  |
|--|--|--|--|--|--|----------------------------------------------------|-----------------|--|

- 2 Reagents were as follow the Deoxynucleoside triphosphates from Thomas Scientific, Swedesboro, NJ., the synthesis of the primers by
- 3 Integrated DNA Technologies (IDT, Coralville, IA, USA), and the Taq polymerase form Thomas Scientific, Swedesboro, NJ.
